# Supplementary material
Source: PubMed Central journal article supplement (PMC6496107)
Supplement: AAC.02414-18-s0001.pdf [file AAC.02414-18-s0001.pdf]

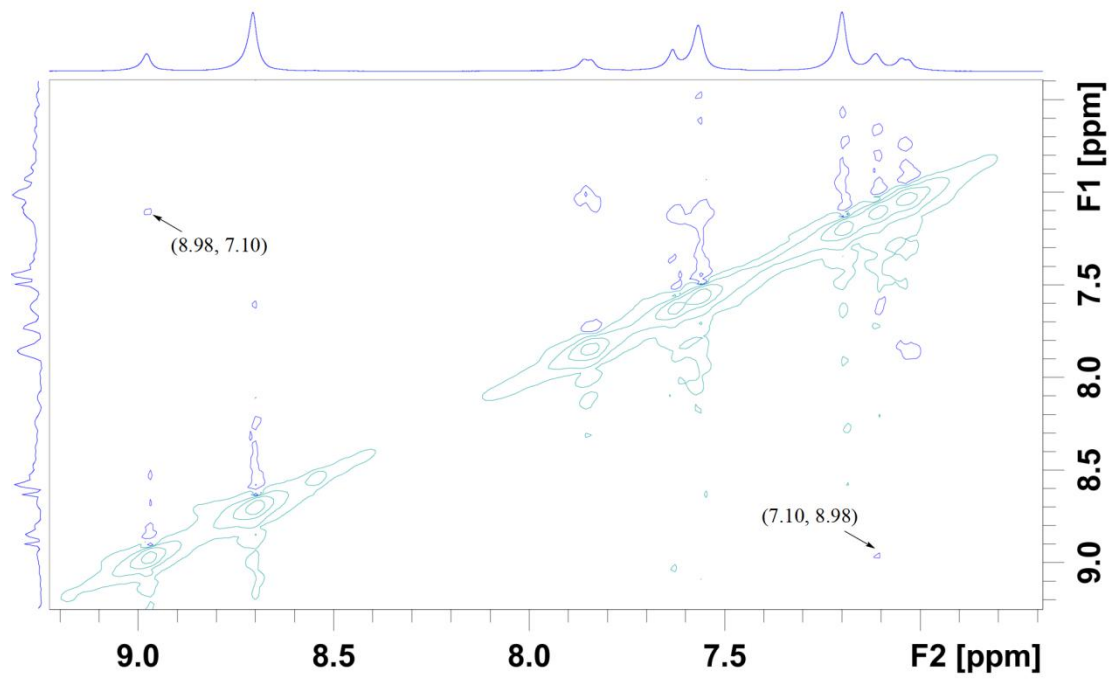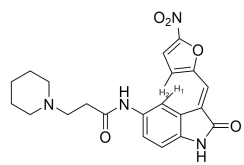

H<sub>1</sub>: (8.98, s) H<sub>2</sub>: (7.10, s)

**Figure S1.** 2D ROSEY spectrum of compound ZY354

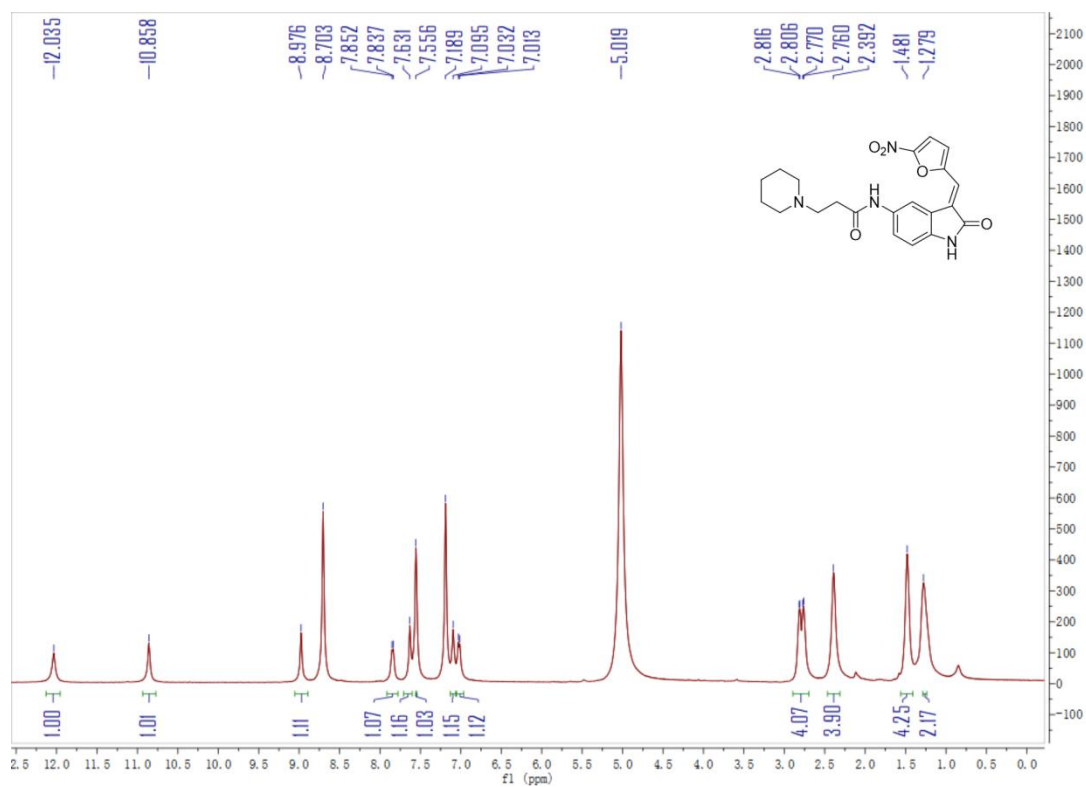

**Figure S2.**  $^1\text{H}$  NMR spectrum of compound ZY354

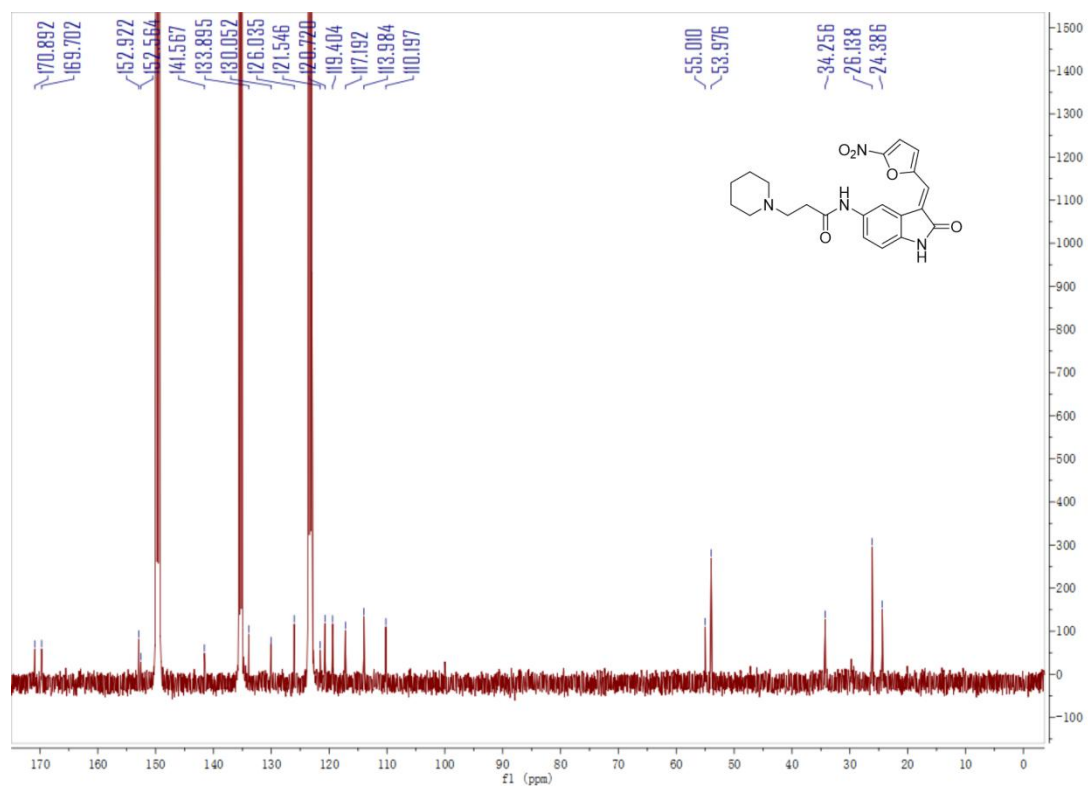

**Figure S3.**  $^{13}\text{C}$  NMR spectrum of compound ZY354

11:00:53  
180823\_LYF\_ZY\_354 6 (0.103) Cm (2:30)

23-Aug-2018  
TOF MS ES+  
2.12e5

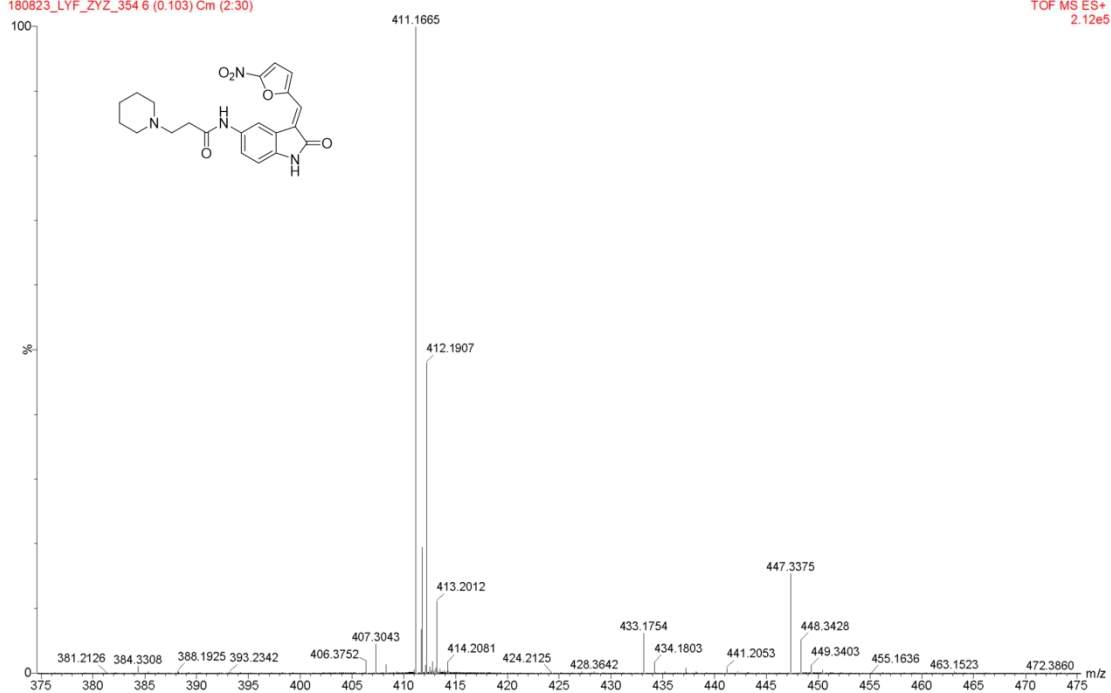

Figure S4. HRMS spectrum of compound ZY354
